# Supplementary material for: Predictive value of neutrophil-to-lymphocyte ratio for distant metastasis in gastric cancer patients
Source: PubMed Central journal article supplement (PMC9205918; doi:10.1038/s41598-022-14379-4), 2022-06-17
Supplement: 41598_2022_14379_MOESM1_ESM.pdf [file 41598_2022_14379_MOESM1_ESM.pdf]

### Predictive value of neutrophil-to-lymphocyte ratio for distant metastasis in gastric cancer patients

Xin Zhang<sup>1M.D.</sup>, Xuan Wang<sup>1 M.D.</sup>, Wenxing Li<sup>1M.D.</sup>, Tuanhe Sun<sup>1M.D.</sup>, Dongmei Diao<sup>#1 M.D., Ph.D.</sup> and Chengxue Dang<sup>#1M.D., Ph.D.</sup>,

<sup>1</sup>Department of Oncology Surgery, First Affiliated Hospital of Xi'an Jiaotong University, Xi'an, China;

# Corresponding Author: Dr. Dongmei Diao and Prof. Chengxue Dang, Ph.D., M.D., Department of Surgical Oncology, First Affiliated Hospital Medical college Xi'an Jiaotong University, 277 West Yanta Road, Xi'an, Shaanxi 710061, P.R. China. Tel: 86-29-85324612, Fax: 86-29-85324612, E-mail:

[diaomei310@mail.xjtu.edu.cn](mailto:diaomei310@mail.xjtu.edu.cn); [dangchengxue@mail.xjtu.edu.cn](mailto:dangchengxue@mail.xjtu.edu.cn).

# these authors contributed equally to this work.

**Supplementary Table 1 AUC and cut points of diagnostic indicators at the maximum of Youden index for peritoneal metastasis (N=163)**

|       | AUC   | 95% CI      | Cut-off | Sen   | Spe   | Youden index | PPV   | NPV   | P value |
|-------|-------|-------------|---------|-------|-------|--------------|-------|-------|---------|
| NLR   | 0.704 | 0.662-0.747 | 2.69    | 0.648 | 0.684 | 0.332        | 0.648 | 0.683 | 0.003   |
| CEA   | 0.557 | 0.507-0.608 | 5.09    | 0.352 | 0.8   | 0.152        | 0.346 | 0.8   | <0.001  |
| CA199 | 0.626 | 0.573-0.679 | 48.84   | 0.377 | 0.88  | 0.257        | 0.377 | 0.88  | <0.001  |
| CA724 | 0.694 | 0.648-0.739 | 3.41    | 0.654 | 0.655 | 0.309        | 0.654 | 0.655 | 0.013   |
| P     | 0.757 | 0.715-0.798 | 0.125   | 0.667 | 0.773 | 0.44         | 0.66  | 0.773 | Ref     |

AUC, area under receiver operating characteristics; CI, confidence interval; Sen, sensitivity; Spe, specificity; PPV, positive predictive value; NPV, negative predictive value; NLR, neutrophil-to-lymphocyte ratio; P, P value for comparison of AUC of reference with other indicators; P, Prediction probability that was obtained by binary logistic regression of CEA, CA199, CA724 and NLR.

**Supplementary Table 2 AUC and the cut points of diagnostic indicators at the maximum of Youden index for osseous metastasis (N=119)**

|       | AUC   | 95% CI      | Cut-off | Sen   | Spe   | Youden index | PPV   | NPV   | P value |
|-------|-------|-------------|---------|-------|-------|--------------|-------|-------|---------|
| NLR   | 0.653 | 0.599-0.707 | 2.36    | 0.639 | 0.601 | 0.24         | 0.661 | 0.600 | 0.313   |
| CEA   | 0.65  | 0.594-0.707 | 3.82    | 0.538 | 0.727 | 0.265        | 0.563 | 0.727 | 0.514   |
| CA199 | 0.555 | 0.498-0.612 | 67.43   | 0.218 | 0.906 | 0.124        | 0.243 | 0.906 | <0.001  |
| CA724 | 0.586 | 0.524-0.648 | 2.75    | 0.597 | 0.589 | 0.186        | 0.603 | 0.589 | 0.017   |
| P     | 0.671 | 0.614-0.727 | 0.1     | 0.521 | 0.774 | 0.295        | 0.529 | 0.763 | Ref     |

P, P value for comparison of AUC of reference with other indicators; P, Prediction probability that was obtained by binary logistic regression of CEA, CA199, CA724 and NLR.

**Supplementary Table 3 AUC and the cut points of diagnostic indicators at the maximum of Youden index for hepatic metastasis (N=192)**

|       | AUC   | 95% CI      | Cut-off | Sen   | Spe   | Youden index | PPV   | NPV   | P value |
|-------|-------|-------------|---------|-------|-------|--------------|-------|-------|---------|
| NLR   | 0.676 | 0.633-0.718 | 2.71    | 0.62  | 0.687 | 0.307        | 0.600 | 0.687 | <0.001  |
| CEA   | 0.733 | 0.693-0.774 | 4.34    | 0.615 | 0.764 | 0.379        | 0.651 | 0.764 | 0.041   |
| CA199 | 0.713 | 0.669-0.757 | 18.69   | 0.615 | 0.742 | 0.357        | 0.614 | 0.738 | 0.002   |
| CA724 | 0.626 | 0.58-0.673  | 7.76    | 0.396 | 0.828 | 0.224        | 0.395 | 0.828 | <0.001  |
| P     | 0.777 | 0.74-0.815  | 0.133   | 0.74  | 0.699 | 0.439        | 0.740 | 0.688 | Ref     |

P, P value for comparison of AUC of reference with other indicators; P, Prediction probability that was obtained by binary logistic regression of CEA, CA199, CA724 and NLR.

**Supplementary Table 4 AUC and the cut points of diagnostic indicators at the maximum of Youden index for multisite metastases (N=122)**

|       | AUC   | 95% CI      | Cut-off | Sen   | Spe   | Youden index | PPV   | NPV   | P value |
|-------|-------|-------------|---------|-------|-------|--------------|-------|-------|---------|
| NLR   | 0.718 | 0.67-0.767  | 2.64    | 0.664 | 0.676 | 0.34         | 0.213 | 0.938 | 0.005   |
| CEA   | 0.629 | 0.572-0.685 | 4.365   | 0.459 | 0.766 | 0.225        | 0.206 | 0.915 | <0.001  |
| CA199 | 0.677 | 0.622-0.732 | 19.44   | 0.549 | 0.746 | 0.295        | 0.223 | 0.926 | 0.002   |
| CA724 | 0.709 | 0.657-0.761 | 5.39    | 0.59  | 0.745 | 0.335        | 0.235 | 0.932 | 0.066   |
| P1    | 0.742 | 0.693-0.79  | 0.095   | 0.648 | 0.735 | 0.383        | 0.244 | 0.94  | 0.316   |
| P2    | 0.765 | 0.719-0.811 | 0.097   | 0.68  | 0.781 | 0.461        | 0.291 | 0.949 | Ref     |

P, P value for comparison of AUC of reference with other indicators; P1, Prediction probability was obtained by binary logistic regression of CEA, CA199 and CA724. P2, Prediction probability that was obtained by binary logistic regression of CEA, CA199, CA724 and NLR.
